# Supplementary material
Source: ML conference proceedings conference paper supplement (https://proceedings.mlr.press/v37/yen15.html)
Supplement: Supplementary file 1 [file yen15-supp.pdf]

## Appendix

### A. Notation

$\mathcal{N} = \{1, 2, \dots, N\} =: [N]$  is the whole set of data points.  $i, j \in \mathcal{N}$  denote points.  $d_{ij} := \mathbb{D}(\mathbf{x}_i, \mathbf{x}_j)$ .  $D$  is the number of data sets.  $\mathcal{T}_d \subseteq \mathcal{N}$  denotes the set of points in the  $d$ -th dataset, i.e.  $\cup_{d=1}^D \mathcal{T}_d = \mathcal{N}$ .  $N_d = |\mathcal{T}_d|$  is the number of points in Dataset  $d$ .  $d(i) \in [D]$  denotes the dataset index of Point  $i$ .  $\mathcal{M} \subseteq \mathcal{N}$  is the set of medoids.  $k, l \in \mathcal{M}$  denote clusters and themselves are medoids.  $\mathcal{S}_k$  is the set of points in Cluster  $k$ .  $N_k = |\mathcal{S}_k|$  is the number of points in Cluster  $k$ .  $M(i) \in \mathcal{M}$  denotes the cluster/representative of Point  $i$ . Let  $\mathcal{D}_k \subseteq [D]$  denote the data sets contained or partially contained in Cluster  $k$ . Denote  $\mathcal{S}_{k,d} := \mathcal{S}_k \cap \mathcal{T}_d$  for  $d \in \mathcal{D}_k$ . Thus  $\cup_{d \in \mathcal{D}_k} \mathcal{S}_{k,d} = \mathcal{S}_k$ . Denote  $N_{k,d} := |\mathcal{S}_{k,d}|$  for  $d \in \mathcal{D}_k$ .

### B. Proof of Theorem 1

Theorem 1 is a direct corollary of Theorem 2, by setting  $\theta = 0$ .

### C. Proof of Theorem 2

First, the convex program (6) has same set of optimal solutions with the following linear program

$$\begin{aligned}
& \min_{w_{ij} \geq 0, \zeta_{d,j}, \xi_j} && \sum_{i=1}^N \sum_{j=1}^N d_{ij} w_{ij} + \theta \sum_{d=1}^D \sum_{j=1}^N \zeta_{d,j} + \lambda \sum_{j=1}^N \xi_j \\
& \text{s.t.} && \sum_{j=1}^N w_{ij} = 1 \\
& && w_{ij} \leq \zeta_{d,j}, \forall i \in \mathcal{T}_d \\
& && w_{ij} \leq \xi_j, \forall i \in [N].
\end{aligned} \tag{14}$$

The KKT condition of the linear programming can be written as

$$d_{ij} - \alpha_{ij} - \beta_i + \gamma_{ij} + \delta_{ij} = 0 \tag{15}$$

$$\theta = \sum_{i \in \mathcal{T}_d} \delta_{ij} \tag{16}$$

$$\lambda = \sum_i \gamma_{ij} \tag{17}$$

$$\delta_{ij}(w_{ij} - \zeta_{d_j}) = 0 \tag{18}$$

$$\gamma_{ij}(w_{ij} - \xi_j) = 0 \tag{19}$$

$$\alpha_{ij} w_{ij} = 0 \tag{20}$$

$$\alpha_{ij} \geq 0 \tag{21}$$

$$\gamma_{ij} \geq 0 \tag{22}$$

$$\delta_{ij} \geq 0. \tag{23}$$

Our goal is to find a structure of  $d_{ij}$ , for which there exists a set of  $\alpha_{ij}, \beta_i, \gamma_{ij}, \delta_{ij}, \theta$  and  $\lambda$  satisfying the above conditions (with  $\alpha_{ij}, \gamma_{ij}, \delta_{ij}$  strictly positive for binding constraints). Then a clustering  $\{\mathcal{S}_k\}_{k \in \mathcal{M}}$  with such structure will be an unique solution to (14). We will discuss the cases entry-by-entry.

**C.1.**  $\xi_j = 1, \zeta_{d_j} = 1, w_{ij} = 1$

$j = M(i), \alpha_{i, M(i)} = 0$

$$\gamma_{i, M(i)} + \delta_{i, M(i)} = \beta_i - d_{i, M(i)}, \quad \forall i \tag{24}$$

**C.2.**  $\xi_j = 1, \zeta_{dj} = 1, w_{ij} = 0$

$j \in \mathcal{M}$ , but  $j \neq M(i)$

$\delta_{ij} = 0, \gamma_{ij} = 0 \Rightarrow \alpha_{ij} = d_{ij} - \beta_i > 0$ , i.e.,

$$\beta_i < d_{ij}, \quad \forall j \in \mathcal{M} \text{ but } j \neq M(i) \text{ and } \mathcal{D}_j \cap \mathcal{D}_{M(i)} \neq \emptyset. \quad (25)$$

**Summary of Section C.1 and C.2**

We can set  $\gamma_{i,M(i)} = \frac{\lambda}{N_{M(i)}}$  such that Eq. (17) holds and  $\delta_{i,M(i)} = \frac{\theta}{N_{M(i),d(i)}}$  such that Eq. (16) holds. Thus,

$$\beta_i = \frac{\lambda}{N_{M(i)}} + \frac{\theta}{N_{M(i),d(i)}} + d_{i,M(i)} \quad (26)$$

**C.3.**  $\xi_j = 1, \zeta_{dj} = 0, w_{ij} = 0$

$j \in \mathcal{M}$ , but  $j \neq M(i)$

$\gamma_{ij} = 0 \Rightarrow \alpha_{ij} = d_{ij} - \beta_i + \delta_{ij} > 0$ . Now we have

$$\begin{aligned} \delta_{ij} &> \beta_i - d_{ij} \\ \delta_{ij} &> 0 \end{aligned}$$

Thus

$$\theta = \sum_{i \in \mathcal{T}_d} \delta_{ij} > \sum_{i \in \mathcal{T}_d} (\beta_i - d_{ij})_+, \quad \forall d \notin \mathcal{D}_j, j \in \mathcal{M} \quad (27)$$

If we set  $\beta_i - d_{ij} < \frac{\theta}{N_{d(i)}}$ , Eq. (27) will be satisfied. That is

$$\frac{\lambda}{N_{M(i)}} + \frac{\theta}{N_{M(i),d(i)}} + d_{i,M(i)} - d_{ij} < \frac{\theta}{N_{d(i)}} \quad (28)$$

**C.4.**  $\xi_j = 0, \zeta_{dj} = 0, w_{ij} = 0$

In this case, we have  $\alpha_{ij} = d_{ij} - \beta_i + \delta_{ij} + \gamma_{ij} > 0$ , that is,

$$\gamma_{ij} > \beta_i - d_{ij} - \delta_{ij} \quad (29)$$

$$\lambda = \sum_i \gamma_{ij} > \sum_i (\beta_i - d_{ij} - \delta_{ij})_+, \quad \forall j \notin \mathcal{M} \quad (30)$$

$$\theta = \sum_{i \in \mathcal{T}_d} \delta_{ij}, \quad \forall d \in [D], \forall j \notin \mathcal{M} \quad (31)$$

To analyze this case, we divide  $i \in [N]$  into three parts. The first part is the points in the same cluster as  $j$  denoted by  $S_{M(j)}$ . The second part is the points who have sister points (sister points mean they belong to the same dataset) in  $S_{M(j)}$  but themselves are not in  $S_{M(j)}$ , denoted by  $S_{1,M(j)} := (\cup_{d \in \mathcal{D}_{M(j)}} \mathcal{T}_d) \setminus S_{M(j)}$ . The third part is all the points who don't have sister points in  $S_{M(j)}$ , denoted by  $S_{2,M(j)} := \cup_{d \in [D] \setminus \mathcal{D}_{M(j)}} \mathcal{T}_d$

$$\begin{aligned} \lambda &> \sum_{i \in S_{M(j)}} (\beta_i - d_{ij} - \delta_{ij})_+ \\ &+ \sum_{i \in S_{1,M(j)}} (\beta_i - d_{ij} - \delta_{ij})_+ \\ &+ \sum_{i \in S_{2,M(j)}} (\beta_i - d_{ij} - \delta_{ij})_+ \end{aligned} \quad (32)$$

In the following we will show our strategy to make this inequality hold.

If we set  $\delta_{ij}$  to be

$$\theta = \left( \sum_{i \in \mathcal{S}_{M(j),d}} \delta_{ij} \right), \quad \forall d \in \mathcal{D}_{M(j)}, \forall j \notin \mathcal{M} \quad (33)$$

$$\delta_{ij} = 0, \quad \forall i \in \mathcal{S}_{1,M(j)}, \forall j \notin \mathcal{M} \quad (34)$$

$$\delta_{ij} = \frac{\theta}{N_{d(i)}}, \quad \forall i \in \mathcal{S}_{2,M(j)}, \forall j \notin \mathcal{M} \quad (35)$$

such that Eq. (16) is satisfied.

Further more, if we can get the following equations satisfied,

$$\begin{aligned} \beta_i - d_{ij} - \delta_{ij} &\geq 0, \quad \forall i \in \mathcal{S}_{M(j)} \\ \beta_i - d_{ij} - \delta_{ij} &< 0, \quad \forall i \in \mathcal{S}_{1,M(j)} \\ \beta_i - d_{ij} - \delta_{ij} &< 0, \quad \forall i \in \mathcal{S}_{2,M(j)} \end{aligned} \quad (36)$$

the only thing we need to show is

$$\begin{aligned} \lambda &> \sum_{i \in \mathcal{S}_{M(j)}} (\beta_i - d_{ij} - \delta_{ij}) \\ &= \sum_{i \in \mathcal{S}_{M(j)}} \left( \frac{\lambda}{N_{M(i)}} + d_{i,M(i)} - d_{ij} \right) \end{aligned}$$

It is equivalent to

$$\sum_{i \in \mathcal{S}_{M(j)}} d_{i,M(i)} < \sum_{i \in \mathcal{S}_{M(j)}} d_{ij},$$

which is satisfied by medoid definition.

In the following, we analyze the conditions under which the three inequalities of Eq. (36) hold.

**First part**  $i \in \mathcal{S}_{M(j)}$  In this part we try to let  $\beta_i - d_{ij} - \delta_{ij} \geq 0$ . As  $\delta_{ij} > 0$ , we require

$$\beta_i - d_{ij} > 0, \quad \forall i \in \mathcal{S}_{M(j)}$$

That is, for  $\forall i, j$  s.t.  $M(i) = M(j)$ ,

$$\frac{\lambda}{N_{M(i)}} + \frac{\theta}{N_{M(i),d(i)}} + d_{i,M(i)} > d_{ij}, \quad (37)$$

Then we can always find a  $\delta_{ij}$  such that  $0 < \delta_{ij} < \beta_i - d_{ij}$ . To satisfy Eq. (33), we require

$$\theta < \sum_{i \in \mathcal{S}_{k,d}} \beta_i - d_{ij}, \quad \forall d \in \mathcal{D}_k, k = M(j)$$

Equivalently, we have

$$\lambda > \frac{N_k}{N_{k,d}} \sum_{i \in \mathcal{S}_{k,d}} d_{ij} - d_{i,M(i)}, \quad \forall d \in \mathcal{D}_k, \forall j \in \mathcal{S}_k, \forall k \quad (38)$$

**Second part**  $i \in \mathcal{S}_{1,M(j)}$  As set in Eq. (34),  $\delta_{ij} = 0$ , we require

$$\beta_i - d_{ij} < 0, \quad \forall i \in \mathcal{S}_{1,M(j)}$$

That is, for  $\forall i, j$  s.t.  $\mathcal{D}_{M(i)} \cap \mathcal{D}_{M(j)} \neq \emptyset$  and  $M(i) \neq M(j)$

$$\frac{\lambda}{N_{M(i)}} + \frac{\theta}{N_{M(i),d(i)}} + d_{i,M(i)} < d_{ij}. \quad (39)$$

This requirement also implies Eq. (25) will hold.

**Third part**  $i \in \mathcal{S}_{2,M(j)}$  For this part,

$$\beta_i - d_{ij} < \frac{\theta}{N_{d(i)}}, \forall i \in \mathcal{S}_{2,M(j)}$$

That is, for  $\forall i, j$  s.t.  $\mathcal{D}_{M(i)} \cap \mathcal{D}_{M(j)} = \emptyset$ ,

$$\frac{\lambda}{N_{M(i)}} + \theta \left( \frac{1}{N_{M(i),d(i)}} - \frac{1}{N_{d(i)}} \right) + d_{i,M(i)} < d_{ij}, \quad (40)$$

This requirement also implies Eq. (28) will hold. □

## D. Proof of Proposition 1

Given the conditions in the proposition, we have

$$\begin{aligned} & \mathbb{D} \circ W_1^* + \lambda_1 \|W_1^*\|_{\infty,1} \\ & \leq \mathbb{D} \circ W_2^* + \lambda_1 \|W_2^*\|_{\infty,1} \\ & < \mathbb{D} \circ W_2^* + \lambda_2 \|W_2^*\|_{\infty,1} \\ & \leq \mathbb{D} \circ W_1^* + \lambda_2 \|W_1^*\|_{\infty,1} \end{aligned} \quad (41)$$

So we have

$$\begin{aligned} \mathbb{D} \circ W_1^* & \leq \mathbb{D} \circ W_2^* \\ \mathbb{D} \circ W_2^* & \leq \mathbb{D} \circ W_1^* \end{aligned}$$

And under the unique optimum assumption, we have  $W_1^* = W_2^*$ .

For the rest of the proof, we first prove that  $\|W^*(\lambda)\|_{\infty,1}$  is a non-increasing function. From Eq. (41),

$$\lambda_2 \|W_2^*\|_{\infty,1} - \lambda_1 \|W_2^*\|_{\infty,1} \leq \lambda_2 \|W_1^*\|_{\infty,1} - \lambda_1 \|W_1^*\|_{\infty,1}$$

that is,

$$(\lambda_2 - \lambda_1)(\|W_2^*\|_{\infty,1} - \|W_1^*\|_{\infty,1}) \leq 0$$

Therefore, for any  $\lambda_1 < \lambda_2$ , we have  $\|W_2^*\|_{\infty,1} \leq \|W_1^*\|_{\infty,1}$ . Now for any  $\lambda \in [\lambda_1, \lambda_2]$ , because  $\|W^*(\lambda_1)\|_{\infty,1} = \|W^*(\lambda_2)\|_{\infty,1}$ , we have  $\|W^*(\lambda)\|_{\infty,1} = \|W_1^*\|_{\infty,1}$ , and further under the unique optimum assumption,

$$W^*(\lambda) = W_1^*$$

□

## E. Proof of Proposition 2

According to Proposition 1, given  $\|W_1^*\|_{\mathcal{G}} = \|W_{12}^*\|_{\mathcal{G}}$ , we have  $W_1^* = W_{12}^*$  and for any  $\theta \in [\theta_1, \theta_2]$ ,  $W^*(\lambda_1, \theta) = W_{12}^*$ . Given  $\|W_2^*\|_{\infty,1} = \|W_{12}^*\|_{\infty,1}$ , we have, for any  $\lambda \in [\lambda_1, \lambda_2]$ ,  $W^*(\lambda, \theta_2) = W_{12}^*$ .

Now we prove for any  $(\lambda, \theta)$  on the line between point  $(\lambda_1, \theta_1)$  and point  $(\lambda_2, \theta_2)$  (defined by  $\mathcal{L}_{12}$ ),  $W^*(\lambda, \theta) = W_1^*$ . We can write

$$\begin{aligned} (\lambda, \theta) & = (1 - \alpha)(\lambda_1, \theta_1) + \alpha(\lambda_2, \theta_2) \\ & = (\lambda_1 + \alpha(\lambda_2 - \lambda_1), \theta_1 + \alpha(\theta_2 - \theta_1)) \end{aligned} \quad (42)$$

where  $\alpha \in [0, 1]$ .

Define

$$\begin{aligned} f(\alpha, W) & = \mathbb{D} \circ W + \theta_1 \|W\|_{\mathcal{G}} + \lambda_1 \|W\|_{\infty,1} \\ & \quad + \alpha((\theta_2 - \theta_1)\|W\|_{\mathcal{G}} + (\lambda_2 - \lambda_1)\|W\|_{\infty,1}) \end{aligned}$$

If we see  $(\theta_2 - \theta_1)\|W\|_{\mathcal{G}} + (\lambda_2 - \lambda_1)\|W\|_{\infty,1}$  as the new regularization term, according to Proposition 1 and  $\operatorname{argmin}_W f(0, W) = \operatorname{argmin}_W f(1, W)$ , we have for any  $\alpha \in [0, 1]$ ,  $\operatorname{argmin}_W f(\alpha, W) = W_1^*$ .

So now we proved that the optimal solutions corresponding to the regularization parameters on the line  $\mathcal{L}_{12}$  are identical. For any

$$(\lambda, \theta) \in \text{Conv}((\lambda_1, \theta_1), (\lambda_1, \theta_2), (\lambda_2, \theta_2)),$$

we can find two points: one is  $A := (\lambda, \theta_2)$  on the line between point  $(\lambda_1, \theta_2)$  and  $(\lambda_2, \theta_2)$ ; the other is  $B := (\lambda, \frac{\lambda_2 - \lambda}{\lambda_2 - \lambda_1} \theta_1 + \frac{\lambda - \lambda_1}{\lambda_2 - \lambda_1} \theta_2)$  which is on the line  $\mathcal{L}_{12}$ . Similarly, we obtain that the optimal solutions corresponding to any points on the line between points  $A$  and  $B$  are identical. Therefore, we finish the proof.  $\square$
